# Supplementary material
Source: PubMed Central journal article supplement (PMC1681509)
Supplement: msb4100077-s1.pdf [file msb4100077-s1.pdf]

## Supplementary Online Material

### Materials and methods

The mitochondrial model and co-sets calculated by Thiele et al used were used (Thiele, Price et al. 2005). The sampling of the steady state each solution space was performed five times by sampling 500,000 random points with 100 iterations between each point. Co-sets were defined as those sets of enzymatic fluxes which were perfectly correlated (correlation coefficient of 1).

The NCBI Entrez Gene ID (<http://www.ncbi.nlm.nih.gov/entrez/>) tags associated with nuclear genes encoding mitochondrial proteins were assembled and all of the genes with diseases associated MIM tags were identified. These sets of genes were then further evaluated for evidence in the literature of causal SNPs related to the corresponding diseases. MIM tags are listed only if causal SNPs have been identified for the particular enzyme deficiency. From the initial 225 unique nuclear encoded mitochondrial proteins in the model, subsequent filtering based on the 33 co-sets described by Thiele et al, resulted in 9 remaining co-sets (see Supplementary Tables 1-9). Associated diseases due to causal SNPs are described for each enzyme in the co-sets unless otherwise stated. From the 56 genes listed below, all but 4 have been identified/associated with an MIM disease tag.

### Supplementary Tables

Summary charts for the set of SNP-disease associated co-sets of human mitochondrial metabolism. Charts are composed of gene abbreviations, gene-IDs, MIM reference tag, and SNP associated diseases/symptoms, respectively column-wise.

#### Supplementary Table 1: Heme co-set

|           |           |           |           |           |           |           |           |
|-----------|-----------|-----------|-----------|-----------|-----------|-----------|-----------|
| ALAD      | CPOX      | FECH      | HMBS      | PPOX      | UROD      | UROS      | ALAS2     |
| 210       | 1371      | 2235      | 3145      | 5498      | 7389      | 7390      | 212       |
| 125270    | 121300    | 177000    | 176000    | 176200    | 176100    | 606938    | 301300    |
| porphyria |

#### Supplementary Table 2: Urea cycle co-set

|                                             |                                    |                                             |                                       |
|---------------------------------------------|------------------------------------|---------------------------------------------|---------------------------------------|
| ASL                                         | ASS                                | CPS1                                        | OTC                                   |
| 435                                         | 445                                | 1373                                        | 5009                                  |
| 207900                                      | 603470                             | 237300                                      | 300461                                |
| failure to thrive,<br>neurological symptoms | vomiting,<br>neurological symptoms | failure to thrive,<br>neurological symptoms | visual problems,<br>gradual blindness |

#### Supplementary Table 3: Phospholipids II co-set

|                                     |                                                                            |                              |
|-------------------------------------|----------------------------------------------------------------------------|------------------------------|
| HMGCS2                              | HMGCL                                                                      | OXCT1                        |
| 3158                                | 3155                                                                       | 5019                         |
| 600234                              | 246450                                                                     | 245050                       |
| hypoglycemia, acidosis,<br>seizures | infantile hypoketotic<br>hypoglycemia, acidosis,<br>hepatomegaly, aciduria | acidosis, vomiting, polypnea |

**Supplementary Table 4: TCA co-set**

| FH          | SDHA                      | SDHB   | SDHC   | SDHD   |
|-------------|---------------------------|--------|--------|--------|
| 2271        | 6389                      | 6390   | 6391   | 6392   |
| 136850      | 600857                    | 185470 | 602413 | 602690 |
| no symptoms | similar to Leigh syndrome |        |        |        |

**Supplementary Table 5: Citrulline/ornithine co-set**

| SLC25A15                                                     | SLC25A2                    |
|--------------------------------------------------------------|----------------------------|
| 10166                                                        | 83884                      |
| 603861                                                       | 608157                     |
| HHH syndrome: hyperorn, hyperamm, momcitrullenemia, neuro sx | recovers from HHH syndrome |

**Supplementary Table 6: OxPhos/ROS detox co-set**

| lots - CYOOm3                                                                                                                 | UQCRB                           | SOD2                                                      |
|-------------------------------------------------------------------------------------------------------------------------------|---------------------------------|-----------------------------------------------------------|
| 4512, 4513, 4514, 1327, 84701, 9377, 1329, 1337, 1339, 1340, 125965, 1345, 1346, 1347, 9167, 1349, 170712, 1350, 1351, 341947 | 7381                            | 6648                                                      |
| no omim                                                                                                                       | 191330                          | 147460                                                    |
|                                                                                                                               | hypoglycemia, liver dysfunction | cardiomyopathy associated with hereditary hemochromatosis |

**Supplementary Table 7: Fatty Acid oxidation co-set**

| CPT2                                                                 | SLC25A20                                                                  | [FAO complex]                               |
|----------------------------------------------------------------------|---------------------------------------------------------------------------|---------------------------------------------|
| 1376                                                                 | 788                                                                       | 33, 35, 1892, 51, 1962, 10449               |
| 600650                                                               | 212138                                                                    | 606885                                      |
| myoglobinuria, hypoketotic hypoglycemia and cardiomyopathy, lethargy | fasting induced coma, seizures, hypotension, hepatomegaly, cardiomyopathy | hypotonia and seizures, developmental delay |

**Supplementary Table 8: Citrate co-set**

| SLC25A1 | PCK1                                     |
|---------|------------------------------------------|
| 6576    | 5105                                     |
| no SNP  | 261680                                   |
|         | hypoglycemia, fatty liver, liver failure |

**Supplementary Table 9: Malate-Aspartate shuttle co-set**

| SLC25A13                                                      | GOT2                             |
|---------------------------------------------------------------|----------------------------------|
| 10165                                                         | 2806                             |
| 603859                                                        | 138150 - no disease descriptions |
| citrullinemia, cholestatic jaundice, fatty liver and fibrosis |                                  |
